# Supplementary figures and images for: Mitochondrial fatty acid synthesis coordinates oxidative metabolism in mammalian mitochondria
Source: eLife journal article supplement (doi:10.7554/elife.58041), 2020-08-17

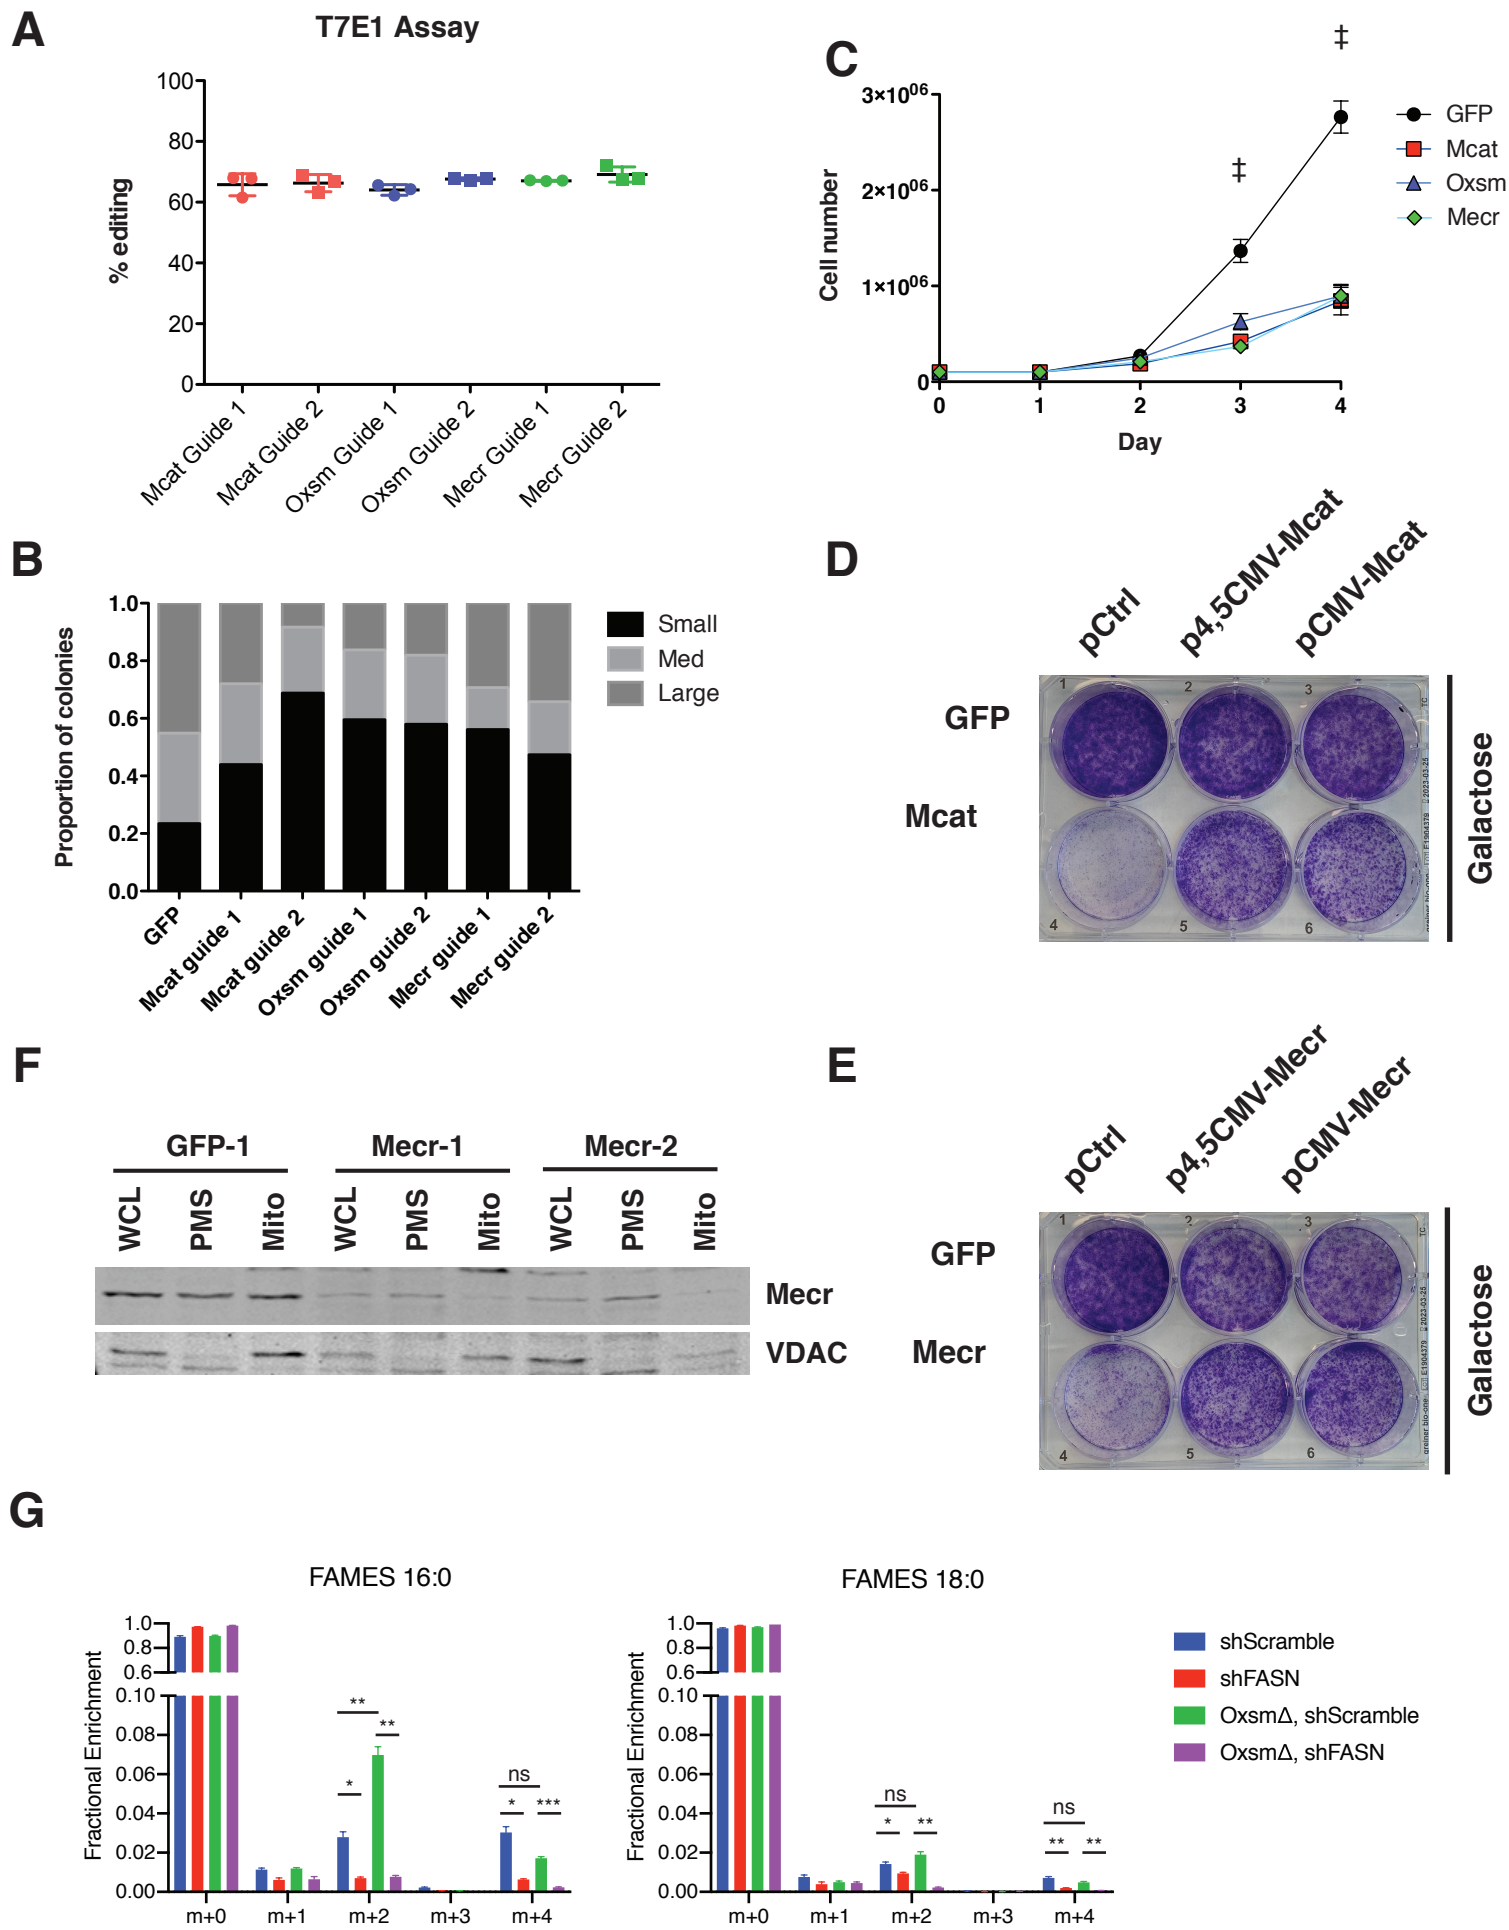

Figure 1 - figure supplement 1

Supplement: supp [file elife_poa_e58041_Figure_1_figure_supplement_1.pdf › elife_poa_e58041_Figure_1_figure_supplement_1.pdf]

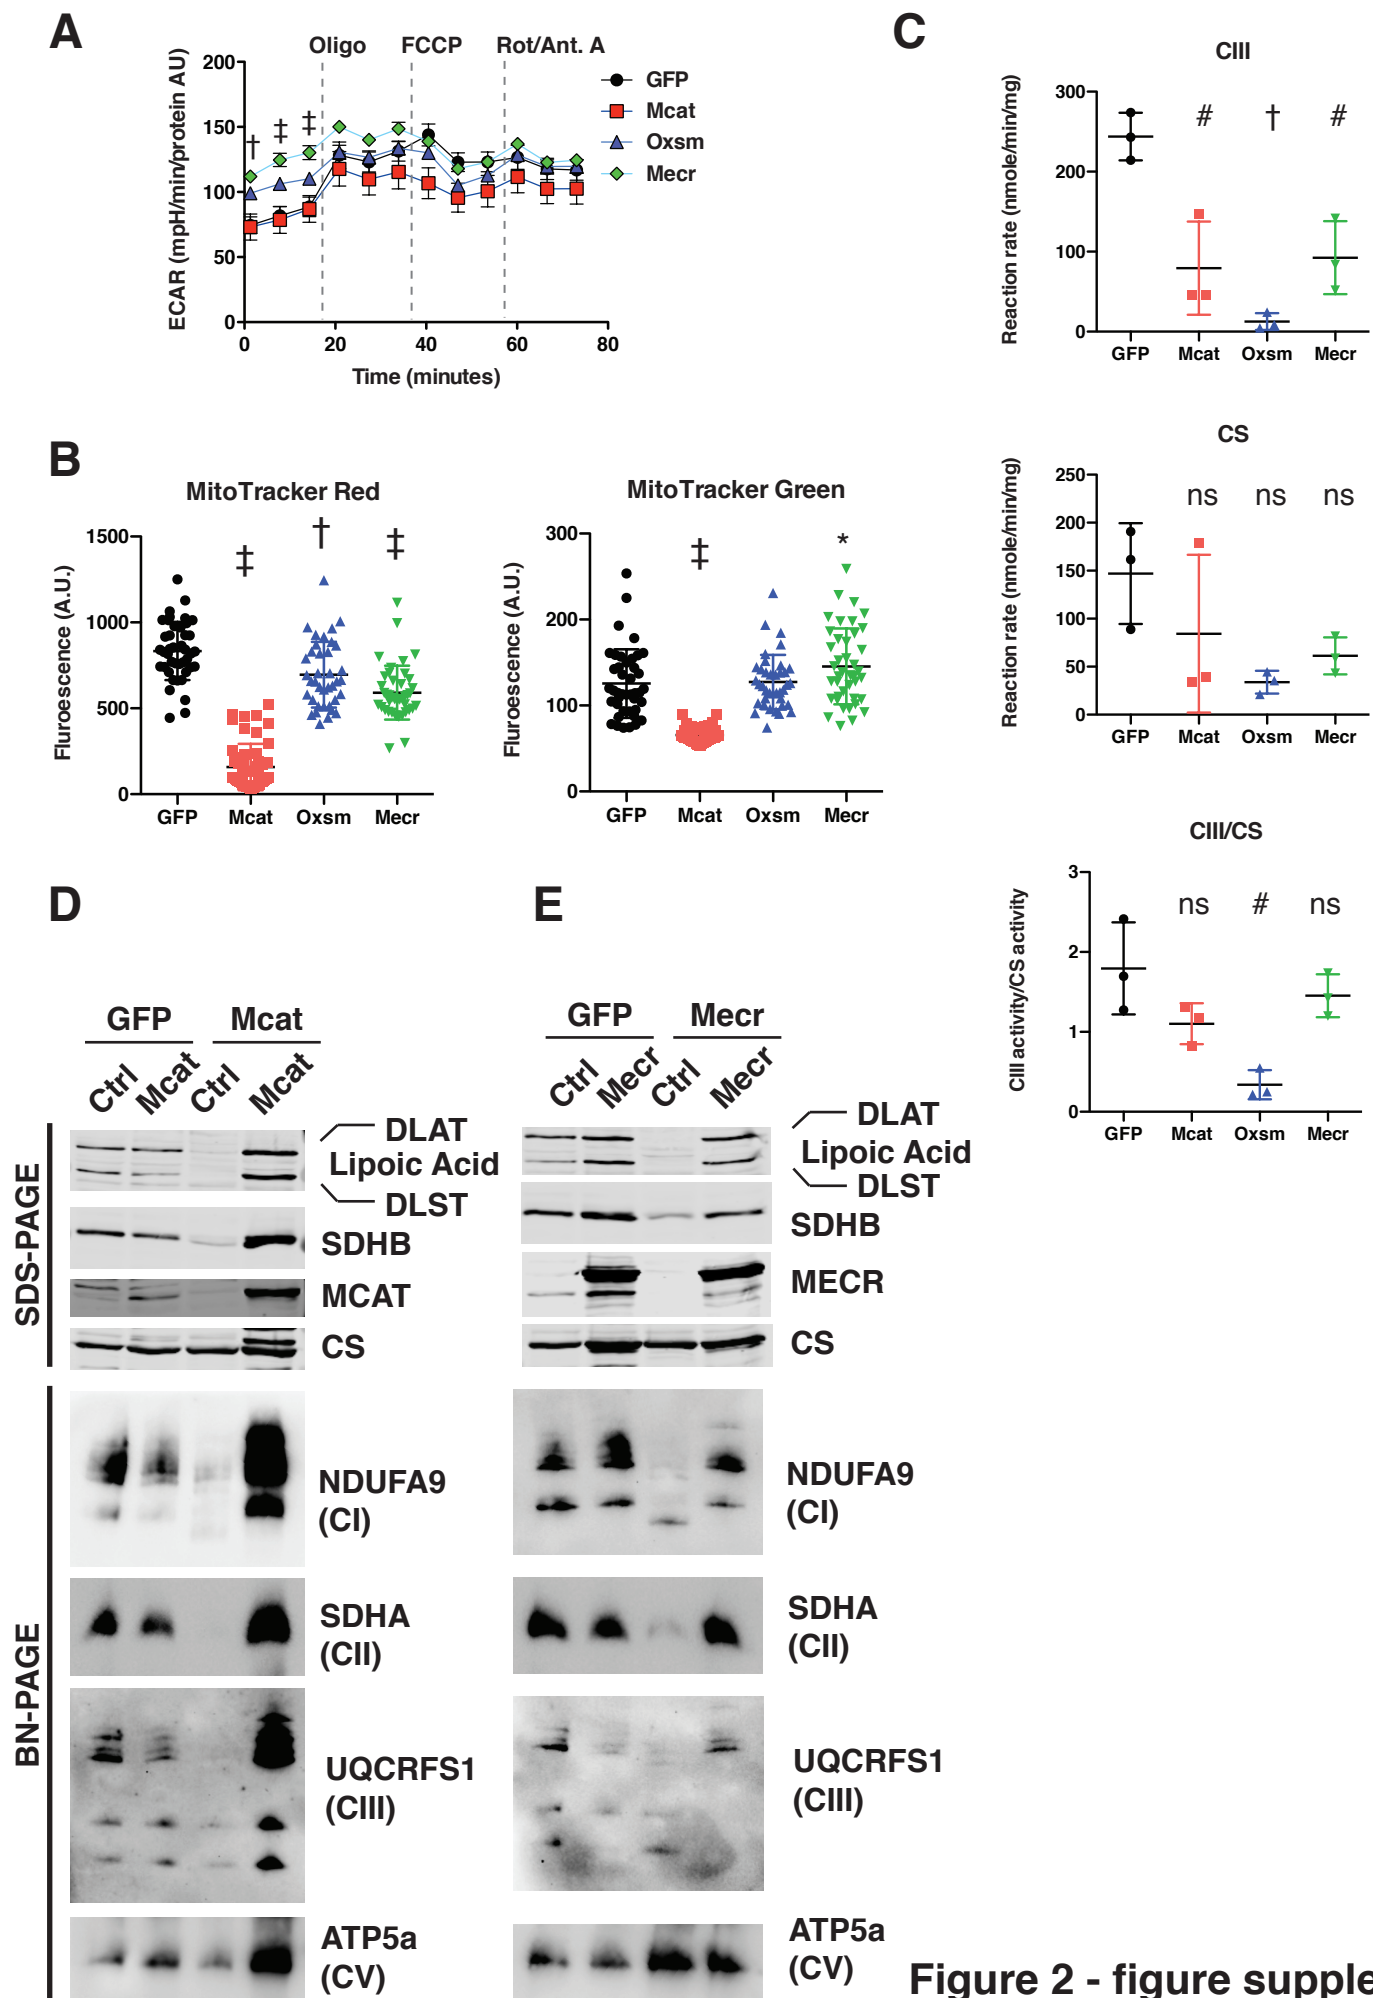

Figure 2 - figure supplement 1

Supplement: supp [file elife_poa_e58041_Figure_2_figure_supplement_1.pdf › elife_poa_e58041_Figure_2_figure_supplement_1.pdf]

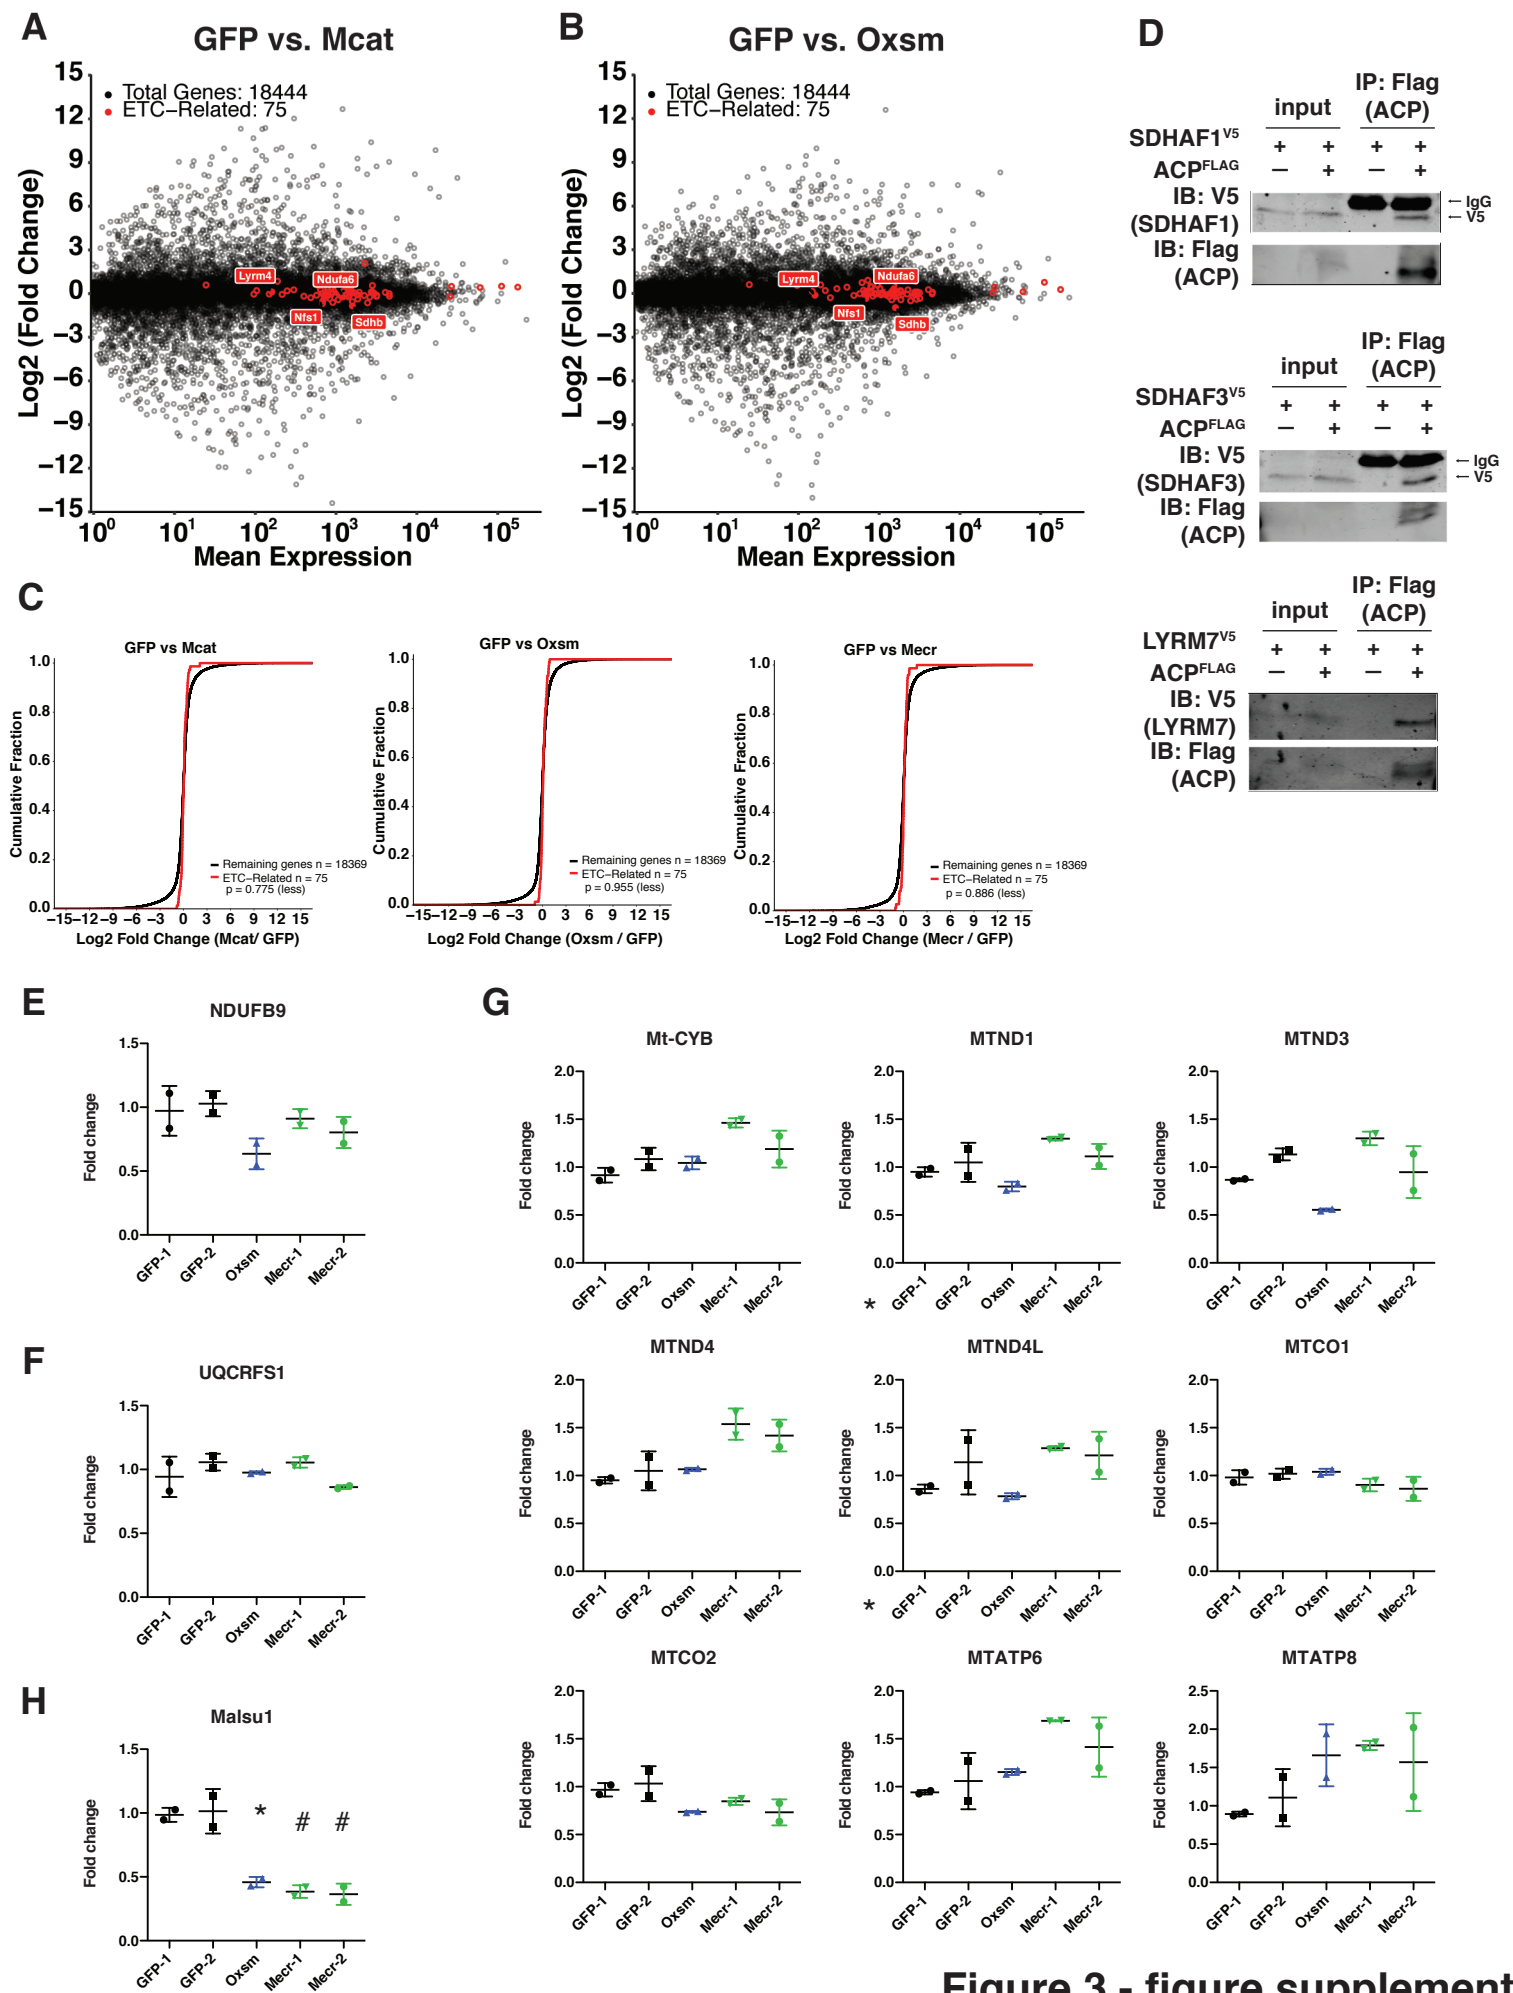

Figure 3 - figure supplement 1

Supplement: supp [file elife_poa_e58041_Figure_3_figure_supplement_1.pdf › elife_poa_e58041_Figure_3_figure_supplement_1.pdf]

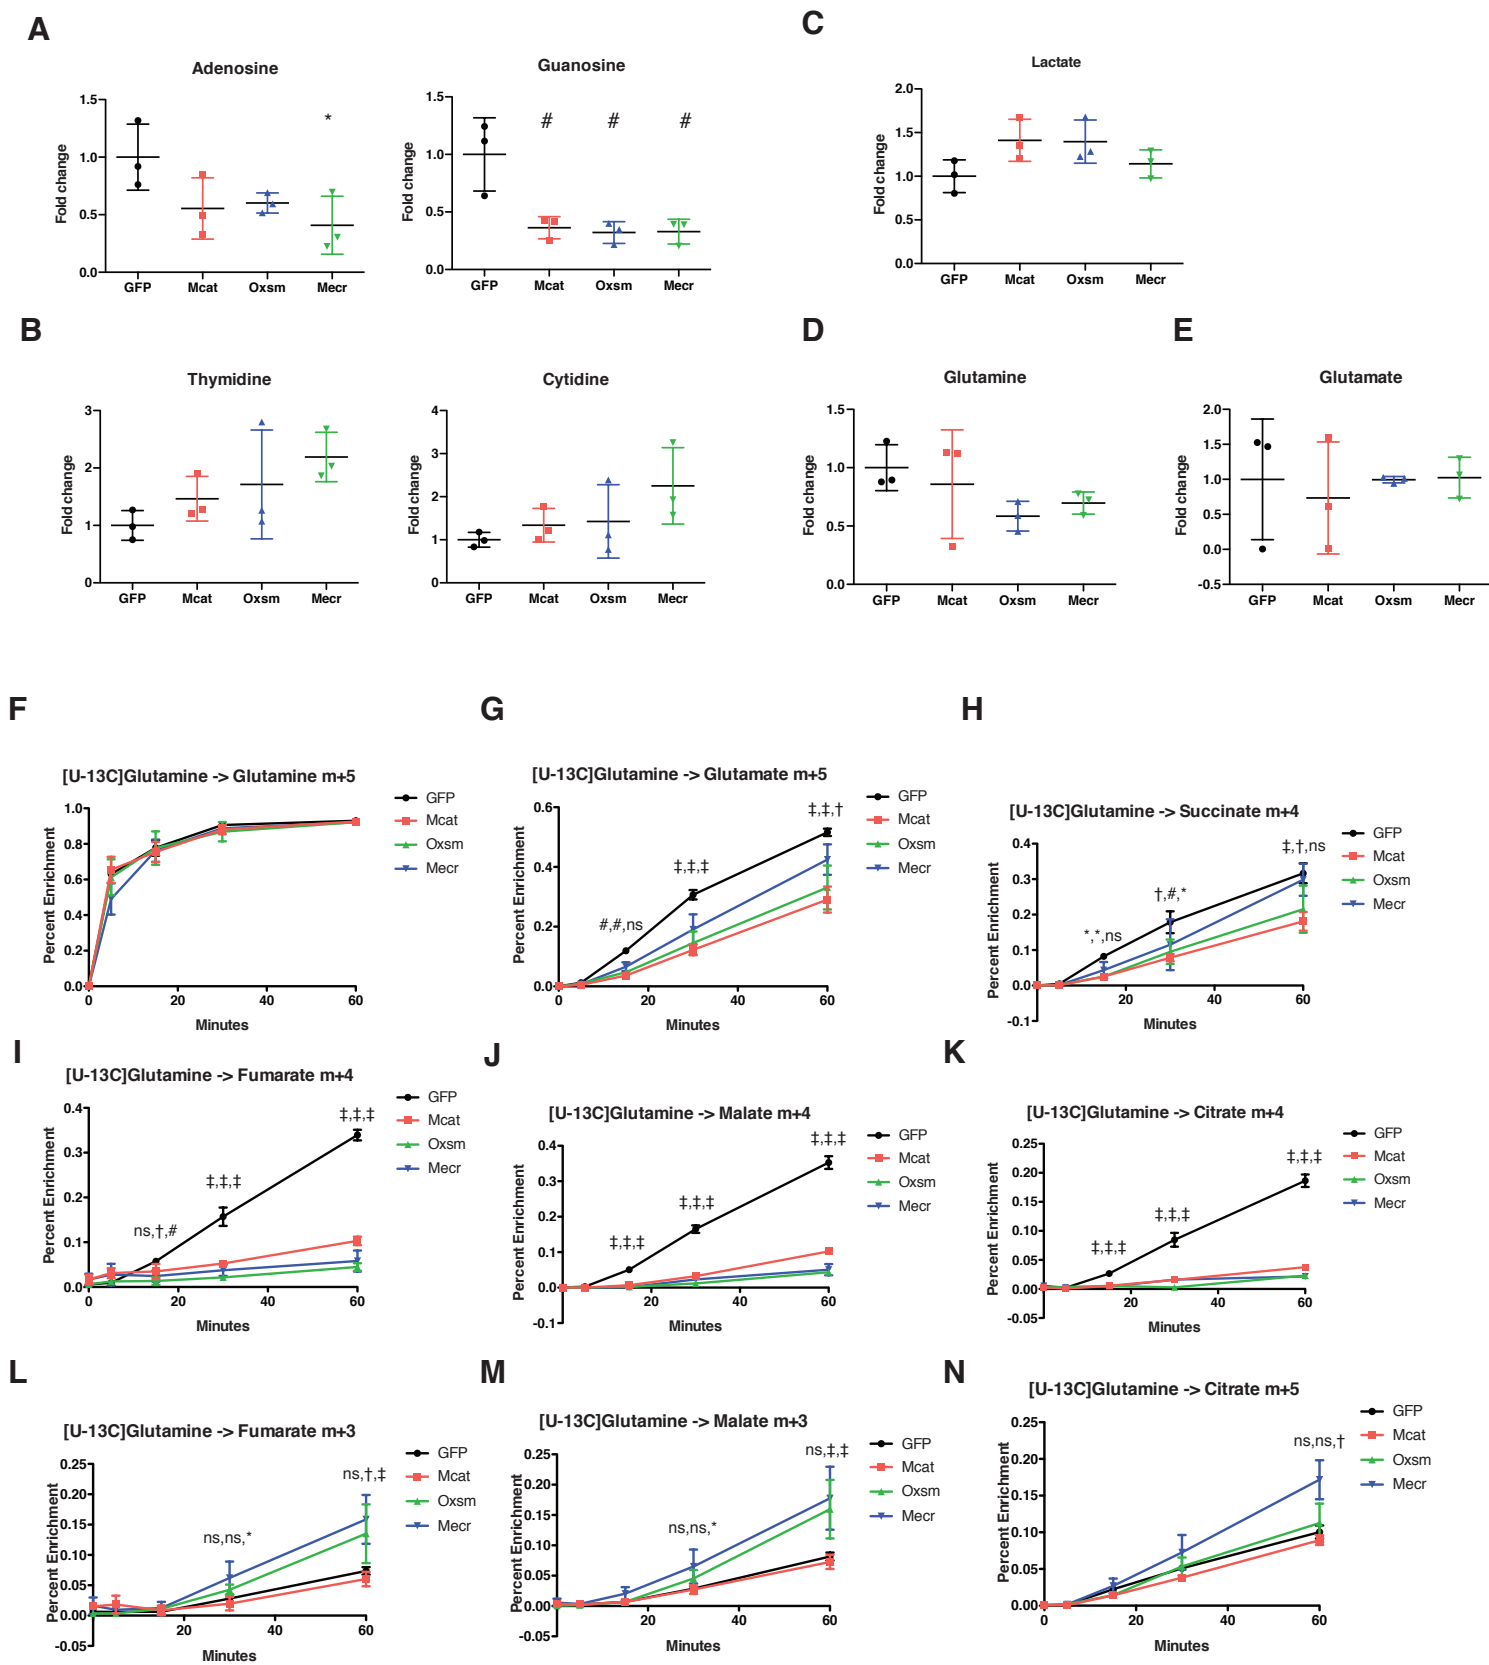

Figure 4 - figure supplement 1

Supplement: supp [file elife_poa_e58041_Figure_4_figure_supplement_1.pdf › elife_poa_e58041_Figure_4_figure_supplement_1.pdf]

**A**

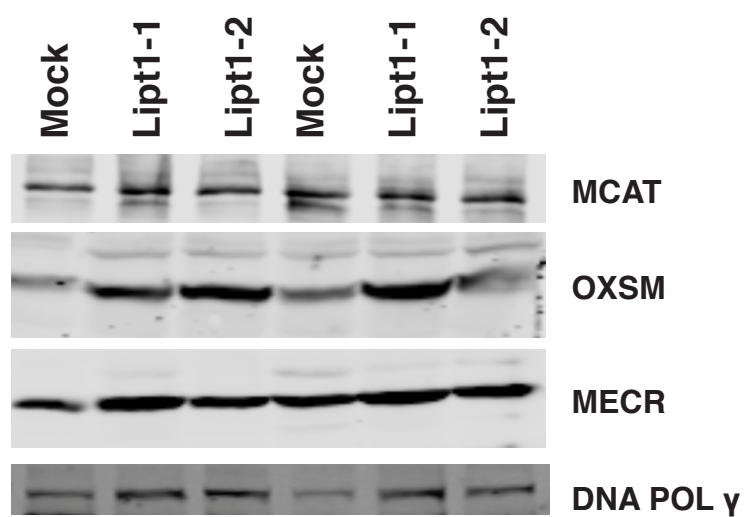

**Figure 5 - figure supplement 1**

Supplement: supp [file elife_poa_e58041_Figure_5_figure_supplement_1.pdf › elife_poa_e58041_Figure_5_figure_supplement_1.pdf]

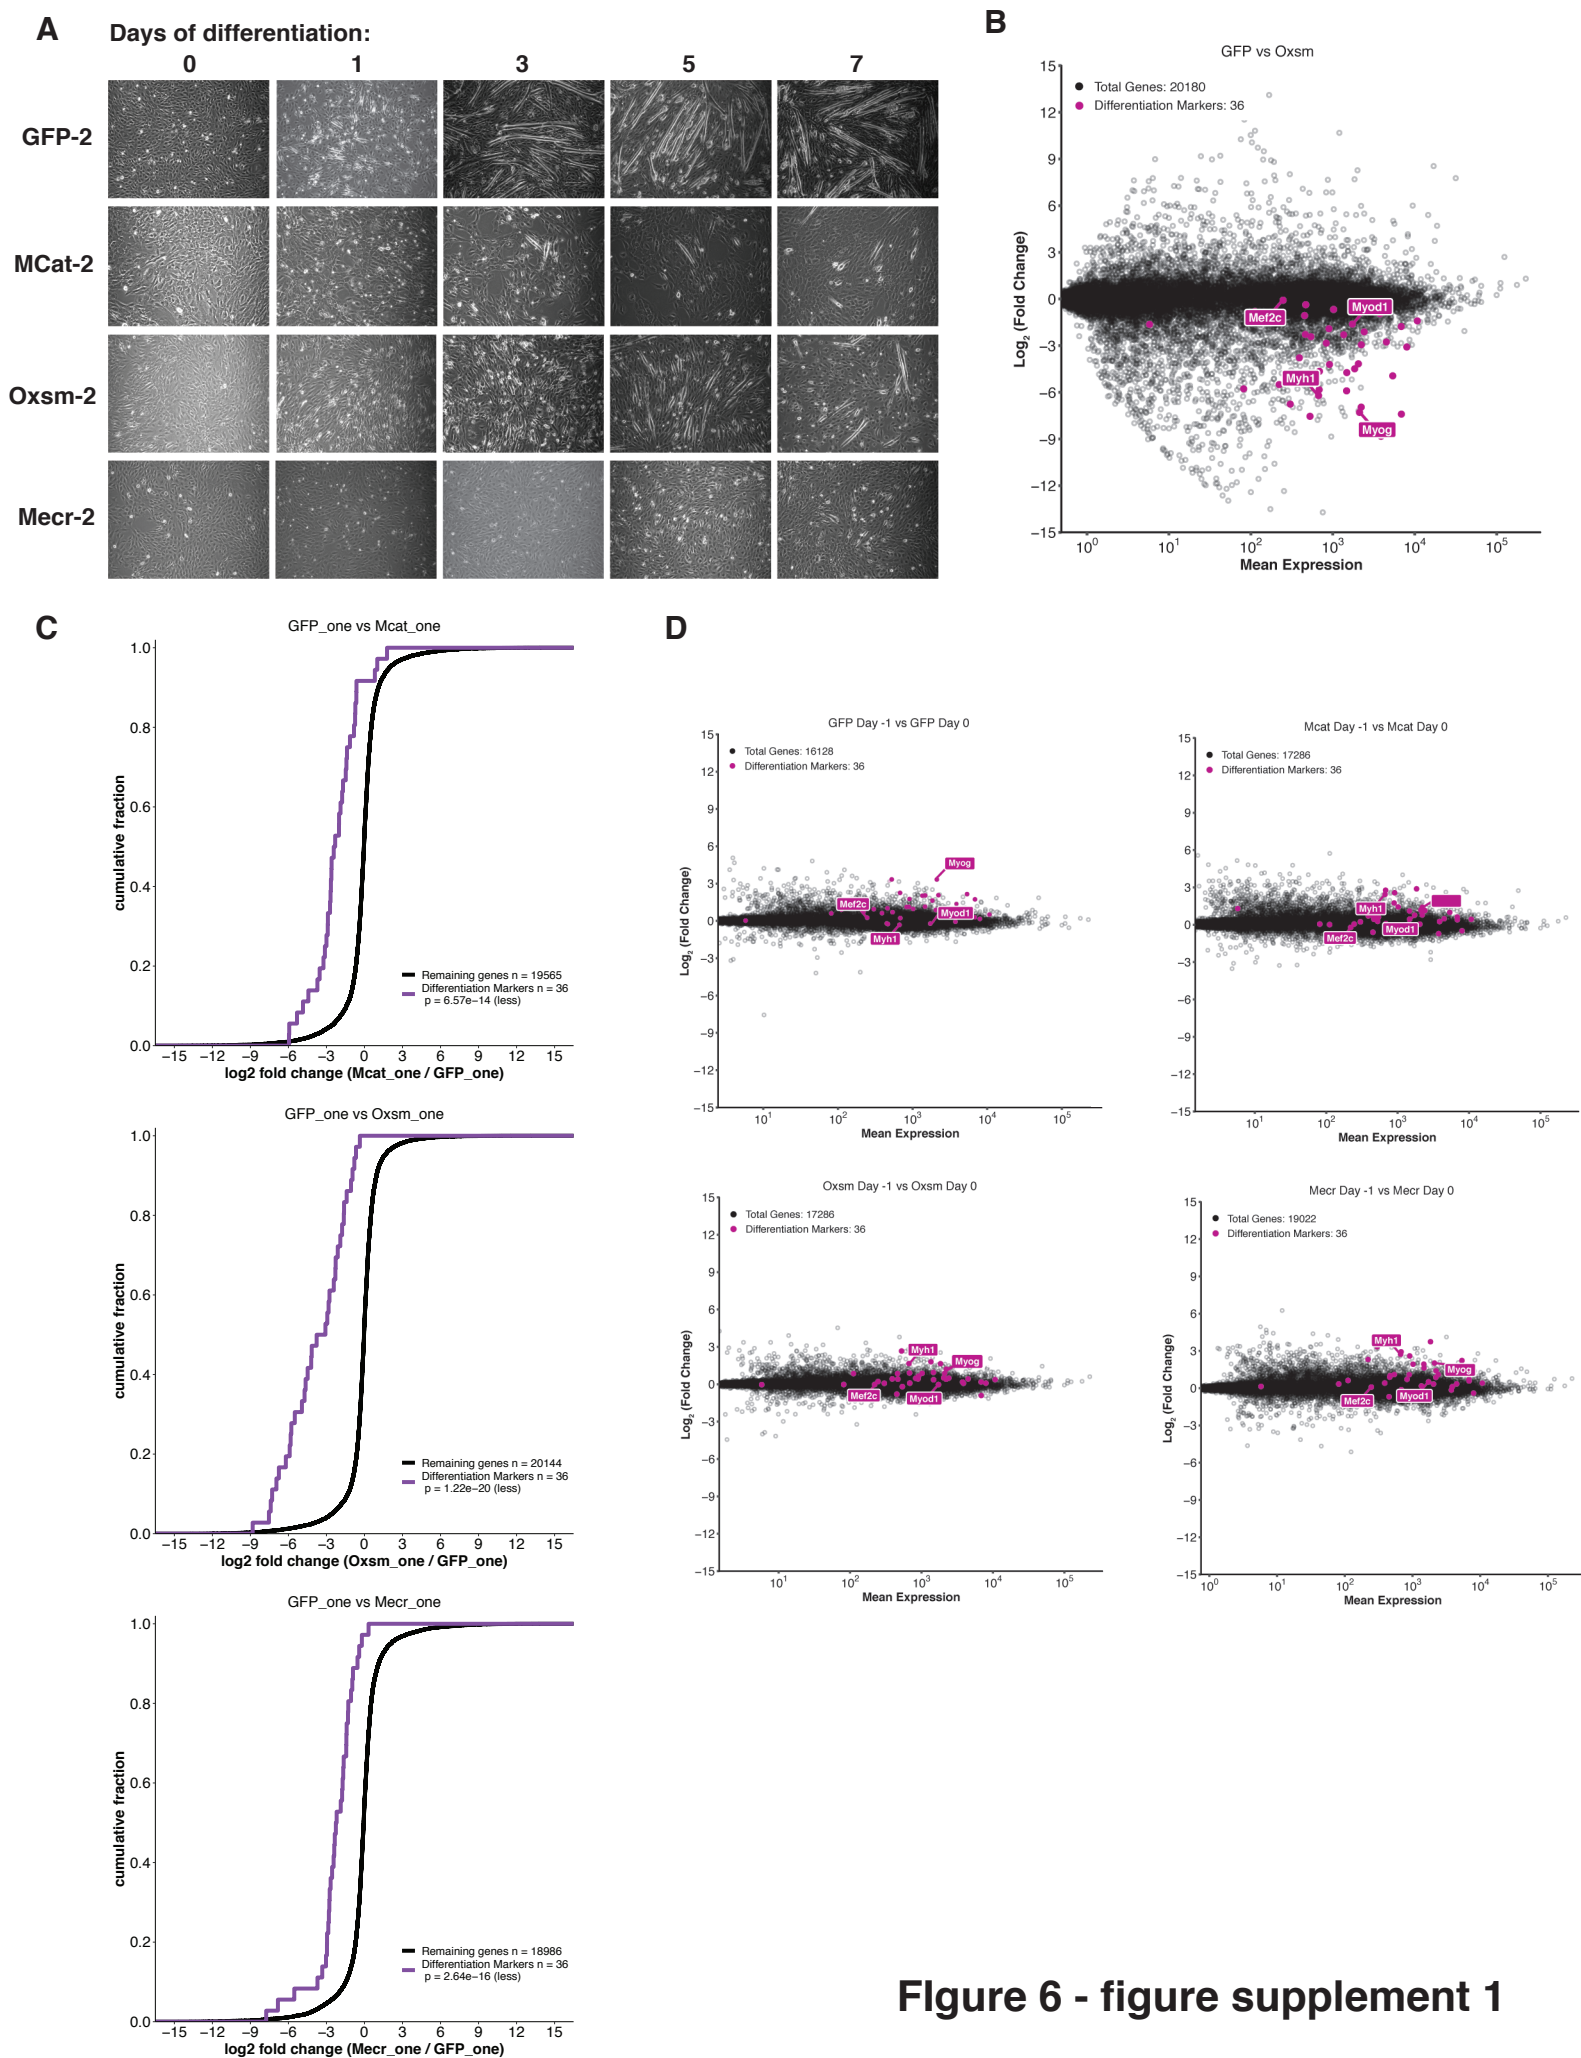

Supplement: supp [file elife_poa_e58041_Figure_6_figure_supplement_1.pdf › elife_poa_e58041_Figure_6_figure_supplement_1.pdf]
